# Supplementary material
Source: PubMed Central journal article supplement (PMC7820805)
Supplement: mmc2.pdf [file mmc2.pdf]

# VPS4A Mutations in Humans Cause Syndromic Congenital Dyserythropoietic Anemia due to Cytokinesis and Trafficking Defects

Katie G. Seu,<sup>1,\*</sup> Lisa R. Trump,<sup>2</sup> Sana Emberesh,<sup>2</sup> Robert B. Lorsbach,<sup>3,4</sup> Clarissa Johnson,<sup>5</sup> Jessica Meznarich,<sup>6,7</sup> Hunter R. Underhill,<sup>8,9</sup> Stella T. Chou,<sup>10,11</sup> HariPriya Sakhivel,<sup>1</sup> Nicolas N. Nassar,<sup>2,4</sup> Kalani J. Seu,<sup>12</sup> Lionel Blanc,<sup>13,14,15</sup> Wenying Zhang,<sup>4,16</sup> Carolyn M. Lutzko,<sup>2,4,17</sup> and Theodosia A. Kalfa<sup>1,4,\*</sup>

## Summary

The Congenital Dyserythropoietic Anemia (CDA) Registry was established with the goal to facilitate investigations of natural history, biology, and molecular pathogenetic mechanisms of CDA. Three unrelated individuals enrolled in the registry had a syndrome characterized by CDA and severe neurodevelopmental delay. They were found to have missense mutations in *VPS4A*, a gene coding for an ATPase that regulates the ESCRT-III machinery in a variety of cellular processes including cell division, endosomal vesicle trafficking, and viral budding. Bone marrow studies showed binucleated erythroblasts and erythroblasts with cytoplasmic bridges indicating abnormal cytokinesis and abscission. Circulating red blood cells were found to retain transferrin receptor (CD71) in their membrane, demonstrating that *VPS4A* is critical for normal reticulocyte maturation. Using proband-derived induced pluripotent stem cells (iPSCs), we have successfully modeled the hematologic aspects of this syndrome *in vitro*, recapitulating their dyserythropoietic phenotype. Our findings demonstrate that *VPS4A* mutations cause cytokinesis and trafficking defects leading to a human disease with detrimental effects to erythropoiesis and neurodevelopment.

The congenital dyserythropoietic anemias (CDAs) are a heterogeneous group of rare genetic disorders of erythropoiesis with distinct morphologic abnormalities of late erythroblasts in the bone marrow, including bi- and multinucleated cells.<sup>1,2</sup> Individuals present with a variable degree of anemia with clinical and laboratory findings of hemolysis, indicating not only impaired production but also decreased survival of the abnormally produced red blood cells (RBCs). Associated iron overload disproportionate to the number of transfusions is a hallmark of ineffective erythropoiesis. To date, there are six genes known to be associated with CDA: *CDAN1* (MIM: 607465), *CDIN1* ([MIM: 615626], previously known as *C15ORF41*), *SEC23B* (MIM: 610512), *KIF23* (MIM: 605064), *KLF1* (MIM: 600599), and *GATA1* (MIM: 305371);<sup>2,3</sup> however, many individuals with CDA remain without an identified genetic diagnosis (non-typable CDA). Through the CDA registry for North America (CDAR; [ClinicalTrials.gov/NCT02964494](https://ClinicalTrials.gov/NCT02964494)), we identified three unrelated probands

with a syndrome characterized by congenital dyserythropoietic anemia and neurodevelopmental disorder who were found to have different missense mutations in *VPS4A* (MIM: 609982).

Vacuolar Protein Sorting 4A (*VPS4A*) is one of two human homologs of the yeast protein *Vps4* and member of the AAA protein family (ATPases associated with diverse cellular activities). It is recruited by the endosomal sorting complexes required for Transport (ESCRT)-III machinery to sites of membrane remodeling and vesicle formation.<sup>4</sup>

*VPS4* was first identified in yeast to be required for endosomal vesicle transport and receptor recycling<sup>5</sup> and has since been shown to participate in a variety of cellular processes including viral budding,<sup>6</sup> exosome biogenesis,<sup>7</sup> and cell division.<sup>8</sup> *VPS4A* and its paralog *VPS4B* have been shown to concentrate at the spindle poles during metaphase and at the midbody during the abscission stage of cytokinesis in HeLa cells; knockdown of either resulted in defects in abscission, centrosome number, and nuclear

<sup>1</sup>Division of Hematology, Cancer and Blood Diseases Institute, Cincinnati Children's Hospital Medical Center, Cincinnati, OH 45229, USA; <sup>2</sup>Division of Experimental Hematology and Cancer Biology, Cancer and Blood Diseases Institute, Cincinnati Children's Hospital Medical Center, Cincinnati, OH 45229, USA; <sup>3</sup>Division of Pathology, Cincinnati Children's Hospital Medical Center, Cincinnati, OH 45229, USA; <sup>4</sup>Department of Pediatrics, University of Cincinnati College of Medicine, Cincinnati, OH 45229, USA; <sup>5</sup>Pediatric Hematology-Oncology Cook Children's Medical Center, Fort Worth, TX 76104, USA; <sup>6</sup>Division of Hematology-Oncology, Department of Pediatrics, University of Utah, Salt Lake City, UT 84132, USA; <sup>7</sup>Primary Children's Hospital, Intermountain Healthcare, Salt Lake City, UT 84113, USA; <sup>8</sup>Division of Medical Genetics, Department of Pediatrics, University of Utah, Salt Lake City, UT 84108, USA; <sup>9</sup>Department of Radiology, University of Utah, Salt Lake City, UT 84108, USA; <sup>10</sup>Division of Hematology, Children's Hospital of Philadelphia, Philadelphia, PA 19104, USA; <sup>11</sup>Department of Pediatrics, Perelman School of Medicine, University of Pennsylvania, Philadelphia, PA 19104, USA; <sup>12</sup>Department of Chemistry, Earlham College, Richmond, IN 47374, USA; <sup>13</sup>Laboratory of Developmental Erythropoiesis, Center for Autoimmune, Musculoskeletal and Hematopoietic Diseases, Institute of Molecular Medicine, The Feinstein Institutes for Medical Research, Manhasset, NY 11030, USA; <sup>14</sup>Les Nelkin Memorial Pediatric Oncology Laboratory, Institute of Molecular Medicine, The Feinstein Institutes for Medical Research, Manhasset, NY 11030, USA; <sup>15</sup>Department of Molecular Medicine and Pediatrics, Zucker School of Medicine at Hofstra/Northwell, Hempstead, NY 11549, USA; <sup>16</sup>Laboratory of Genetics and Genomics, Division of Human Genetics, Cincinnati Children's Hospital Medical Center, Cincinnati, OH 45229, USA; <sup>17</sup>Hoxworth Blood Center, University of Cincinnati College of Medicine, Cincinnati, OH 45229, USA

\*Correspondence: [katie.giger@cchmc.org](mailto:katie.giger@cchmc.org) (K.G.S.), [theodosia.kalfa@cchmc.org](mailto:theodosia.kalfa@cchmc.org) (T.A.K.)  
<https://doi.org/10.1016/j.ajhg.2020.10.013>

© 2020

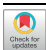

**Table 1. Clinical and Laboratory Findings in the CDAR-Enrolled Probands with VPS4A Mutations**

| VPS4A (NM_013245.2) Mutations                        | Age, Sex, & Ethnic Background              | Laboratory Findings                              |         |        |                                                           |                                                                  |                                 |                                                                                                                                                                                                                                            |  |
|------------------------------------------------------|--------------------------------------------|--------------------------------------------------|---------|--------|-----------------------------------------------------------|------------------------------------------------------------------|---------------------------------|--------------------------------------------------------------------------------------------------------------------------------------------------------------------------------------------------------------------------------------------|--|
|                                                      |                                            | Lowest Hb                                        | ARC     | MCV    | Ferritin (F) / LIC                                        | Age at First Transfusion                                         | Transfusion Requirement         | Non-hematologic findings                                                                                                                                                                                                                   |  |
| 1 <i>de novo</i> c.850A>T (p.Arg284Trp) heterozygous | 6 y.o., F, European- and Hispanic-American | 7.3 (increased irritability when anemia worsens) | 380–500 | 89–98  | F 840, LIC 12.1 at 4y.o., now controlled with deferasirox | neonate (EGA 35 wks)                                             | every 4–6 weeks                 | severe global developmental delay, microcephaly, microgyria, dystonia (axial hypotonia with appendicular hypertonia), suspected Leber congenital amaurosis and/or cortical blindness, failure to thrive, frequent urinary tract infections |  |
| 2 <i>de novo</i> c.608G>A (p.Gly203Glu) heterozygous | 5 y.o., M, European- and Hispanic-American | 6.1                                              | 40–500  | 80–100 | F 4093, LIC 8.82 at 5y.o., on deferasirox                 | neonate (EGA 34 wks)                                             | every 4–10 weeks                | severe global developmental delay, seizure disorder, microcephaly, microgyria, dystonia (axial hypotonia with appendicular hypertonia), congenital bilateral cataracts, failure to thrive, chronic kidney disease (stage II-III)           |  |
| 3 c.83C>T (p.Ala28Val) homozygous                    | 3 y.o., F, Arabic                          | 6.9                                              | 240–400 | 88–99  | F 470 LIC 6.5, at 2.5 y.o. before starting deferasirox    | neonate (EGA 35 wks) exchange transfusion for hyperbilirubinemia | occasionally (every 2–6 months) | global developmental delay, macrocephaly, dystonia (axial hypotonia with appendicular hypertonia), delayed myelination, esotropia, frequent urinary tract infections                                                                       |  |

Abbreviations, normal range, and units: y.o., years old; Hb, hemoglobin concentration (11.5–13.5 g/dL); ARC, absolute reticulocyte count (29–80 10<sup>6</sup>/μL); MCV, mean corpuscular volume (75–87 fL); F, serum ferritin (10–150 ng/mL); LIC, liver iron content (<2.4 mg/g dry liver weight) based on T2\* MRI or Ferriscan; EGA, estimated gestation age. All the probands were noted at birth to have hepatomegaly and cholestasis that gradually improved. They have persistent splenomegaly.

morphology, making VPS4A an attractive candidate cause of CDA.<sup>9</sup>

Three individuals enrolled in CDAR, after written informed consent was provided by the families (details included in the [Supplemental Material and Methods](#)), were noted to have non-typable CDA with a similar syndromic phenotype (Table 1). In addition to CDA pathology in bone marrow studies and laboratory findings indicating macrocytic hemolytic anemia with brisk reticulocytosis, splenomegaly, and accelerated iron overload disproportionate to the volume of RBC transfusions received, all three children had a significant neurodevelopmental disorder, similar to the one described in detail by Rodger et al.<sup>10</sup> The first two probands had severe global developmental delay and congenital microcephaly with brain MRI showing moderate to marked deficiency of hemispheric white matter with global cerebral volume loss, thin corpus callosum, and atrophy of the cerebellum and the pons, suggestive of a neurodegenerative syndrome (Figure S1). The third proband, offspring of consanguineous parents, had a milder hematologic phenotype, requiring after infancy fewer than four transfusions yearly, typically due

to hemolytic crises usually with a febrile illness. She had a static developmental age of 6–8 months with brain MRI showing also diffuse prominence of all supratentorial ventricles and subarachnoid fluid spaces *ex vacuo*, thin corpus callosum, diffuse cerebral gray and white matter parenchymal volume loss, and delay in white matter myelination (Figure S1).

Probands 1 and 2 had transfusion-dependent anemia with bone marrow studies showing 3%–7% binucleated erythroblasts (Figure 1A), initially thought to have CDA-I (MIM: 224120). Interestingly, cytoplasmic bridges were observed, rather than the nuclear bridges typically seen in CDA-I.<sup>11</sup> Proband 3 had fewer binucleated erythroblasts in her bone marrow aspirate (Figure 1A), compatible with her milder hematologic phenotype. Nevertheless, she had accelerated iron overload indicative of ineffective erythropoiesis.

Next generation sequencing (NGS) and deletion/duplication analysis by comparative genomic hybridization on a panel of genes for hereditary hemolytic anemias due to RBC membrane disorders, enzymopathies, and CDAs did not reveal a causative mutation; therefore, whole-exome

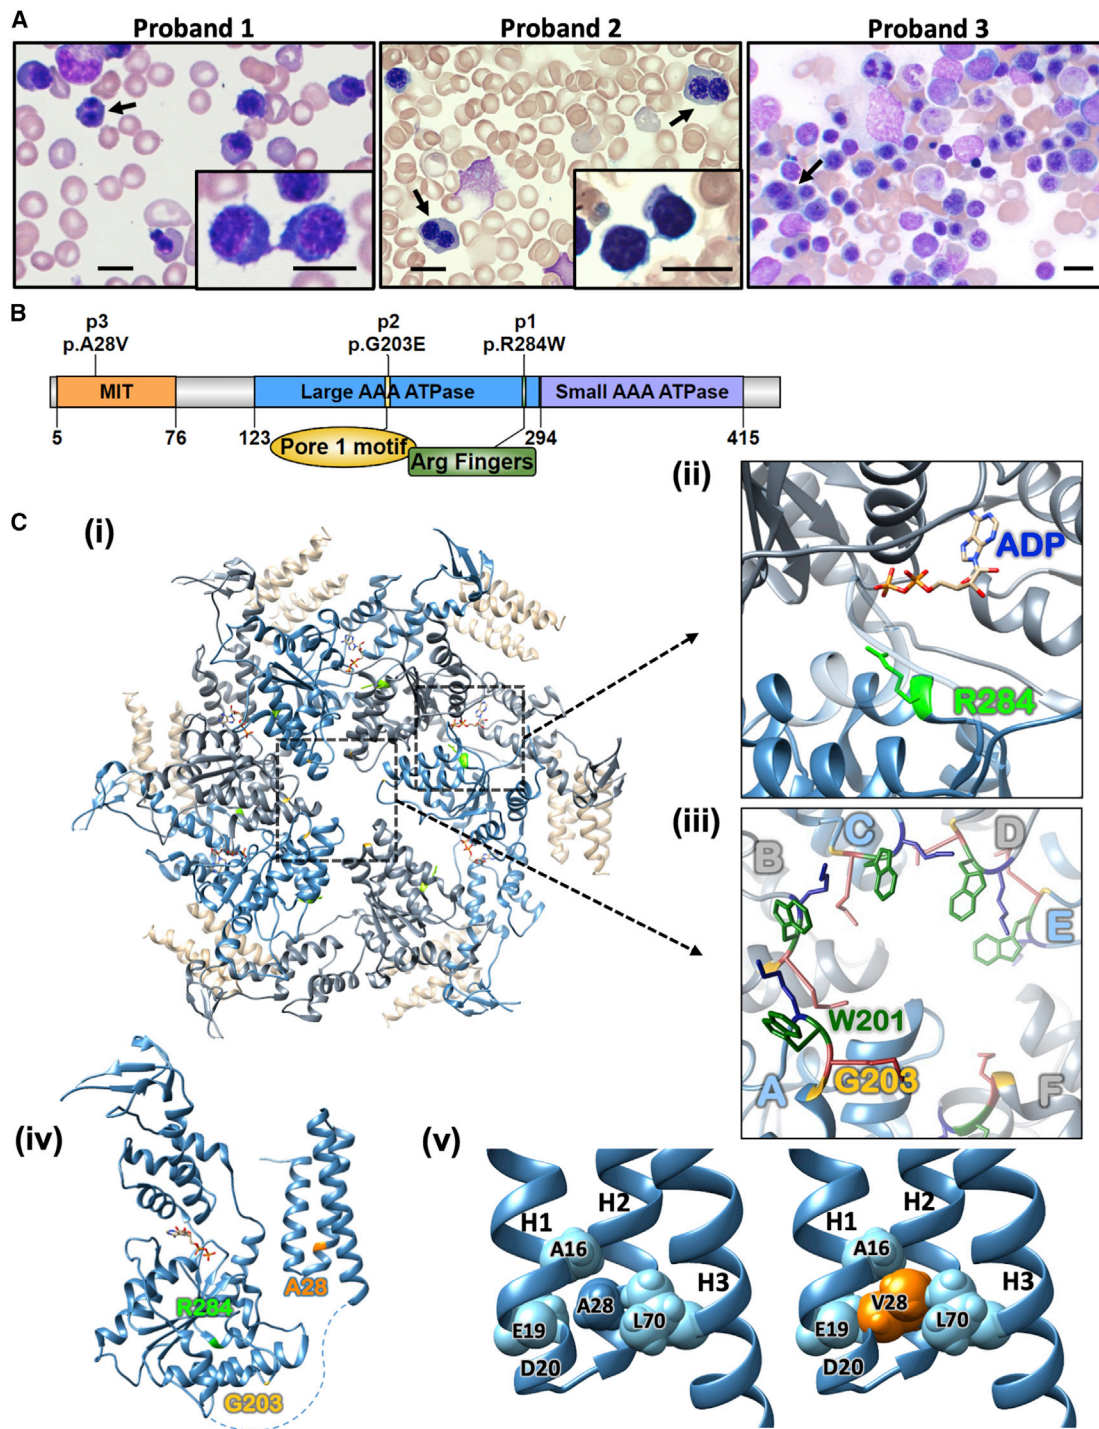

**Figure 1. Genotype and Erythroid Phenotype of Individuals with VPS4A Mutations**

(A) Bone marrow aspirate smears from each proband showing erythroid hyperplasia. Erythroblasts show megaloblastoid changes and include cells with binucleation (arrows) and cytoplasmic bridges joining erythroblasts post-division, noted especially in probands 1 and 2 (insets). Scale bar 10  $\mu$ m.

(B) Diagram of VPS4A protein structure. The N-terminal MIT domain is followed by a flexible linker and an ATPase cassette consisting of a large and small ATPase domain and a  $\beta$ -domain. The location of the mutations found in the probands is marked.

(C) (i) Ribbon diagram of Vps4 proteins assembled in a hexamer (PDB: 6AP1). Residues mutated in the probands are colored green (Arg284 [R284] in p1) and yellow (Gly203 [G203] in p2). The numbering for human VPS4A is used, depicting the homologous residues in the yeast Vps4. Insets show (ii) the ADP in binding site at the interface of two adjacent subunits (blue and gray) with Arg284 (R284 in green) and (iii) the central pore of the hexamer where Gly203 (G203 in yellow) in the pore loop is crucial for the arrangement of Trp201 (W201 in dark green) forming hydrophobic binding pockets for ESCRT-III proteins passing through the central pore.<sup>12</sup> (iv) Ribbon diagram of a Vps4 monomer based on PDB: 6AP1 for yeast Vps4 and PDB: 1YXR for human MIT domain. Residues mutated in the

(legend continued on next page)



sequencing (WES) was performed for each proband in a family-trio design. Proband 1 and 2 were each found to have a single *de novo* heterozygous missense mutation in *VPS4A* (GenBank: NM\_013245.2): c.850A>T (p.Arg284Trp) and c.608G>A (p.Gly203Glu), respectively, affecting residues in the highly conserved large ATPase domain of *VPS4A*. Proband 3 had the homozygous *VPS4A* (GenBank: NM\_013245.2) mutation c.83C>T (p.Ala28Val), occurring in the N-terminal microtubule interacting and trafficking domain (MIT) (Table 1 and Figures 1B and 1C). Her asymptomatic parents were heterozygous for this variant and had a normal hematologic phenotype. The *VPS4A* variants found in the probands have not been reported in HGMD, ClinVar, or NCBI variant databases and were absent in the ExAC and gnomAD v2.1.1 and v3 control population databases. All affected amino acid residues are highly conserved across species down to yeast (Figure S2) and the *in silico* prediction for the substitutions were probably damaging (PolyPhen-2), deleterious (SIFT), and disease causing (MutationTaster).

Via its MIT domain, Vps4 binds to ESCRT-III subunits through their MIT interacting motif (MIM). This promotes the assembly of Vps4 into a ring-shaped hexamer (Figure 1Ci), resulting in the generation of an active enzyme. The ESCRT-III filaments then bind within the pore at the center of the hexamer and ATP hydrolysis drives their translocation through the pore, constricting and ultimately disassembling ESCRT-III in order to achieve membrane fission.<sup>14–17</sup> Since *VPS4A* is 60% similar to Vps4 and shares its highly conserved functional domains, we have used this model, built upon cryo-EM studies,<sup>16</sup> to visualize the location and potential impact of the mutations found in the probands discussed here.

*VPS4A* c.850A>T (p.Arg284Trp) is a mutation of the penultimate base of exon 8 and multiple splice prediction algorithms suggested it may affect the splice donor site of intron 8. However, PCR-amplification performed on cDNA generated from proband 1-reticulocyte mRNA followed by Sanger sequencing of the single band in the gel confirmed that this is a missense and not a splicing variant (Figure S3). The Arg284 residue is one of two arginine fingers functioning in the ATP binding pocket.<sup>14</sup> The arginine fingers from one subunit protrude into the ATP binding pocket of the adjacent subunit (Figure 1Cii) and interact with the  $\gamma$ -phosphate of ATP, promoting hydrolysis.<sup>18</sup> Therefore, alteration of Arg284 would be expected to compromise ATP hydrolysis and the function of *VPS4A* as an ATPase. The Gly203 residue altered in proband 2 is part of the pore loop 1 motif which forms the central pore of the active hexamer. The glycine at this position is highly conserved, as it is the only amino acid that permits

the packing and conformation required for the adjacent pore loop 1 residues Trp201 and Leu202 to create binding pockets for the sidechains of the ESCRT-III subunits passing through the pore (Figure 1Ciii).<sup>4,12</sup> Site-directed mutagenesis of Gly203 to even an alanine (p.Gly203Ala) in human *VPS4A* has been shown to cause loss of function, inhibiting viral budding *in vitro*.<sup>19</sup> The Ala28 residue in the N-terminal MIT domain of *VPS4A*, altered by both alleles in proband 3, is one of a series of conserved alanines that form an “alanine zipper,” which bundles together the 3 helices of the MIT domain (Figure 1Civ).<sup>20</sup> Binding of this domain to the MIMs of ESCRT-III proteins is considered necessary for hexamer formation and enzyme activation.<sup>4</sup> Modeling of Val at position 28 in the structure of the MIT domain of human *VPS4A* results in steric clashes with several amino acid side chains in both helices 1 (H1) and 3 (H3), as well as the backbone of H1 (Figure 1Cv). Thus, the p.Ala28Val variant may affect *VPS4A* function by altering MIT domain structure. Further studies will be necessary to demonstrate whether this affects interaction with MIM1 or MIM2 domains, or both, and what impact this has on assembly and activity of the ESCRT-III complex.<sup>15,21</sup>

Based on the pedigree and the clinical findings in proband 3, this variant appears pathogenic only when homozygous. Although still within the spectrum of the same syndrome, the phenotype is somewhat milder than the clinical picture secondary to *de novo* heterozygous variants in the large ATPase domain which appear to exert a more detrimental, dominant-negative effect,<sup>10,22</sup> demonstrating evidence of genotype-phenotype correlation. The homozygous p.Ala28Val variant in proband 3 putatively disrupts *VPS4A* interaction with ESCRT-III proteins due to altered structure of the MIT domain, rather than directly affecting its ATPase activity.

To investigate the impact of the identified variants on *VPS4A* function in erythroid cells, we evaluated the transferrin receptor (CD71) downregulation on the reticulocyte membrane in the probands' blood samples, a process dependent on normal endosomal sorting and exosome secretion.<sup>23,24</sup> We examined the peripheral RBCs by flow cytometry for cell surface expression of CD71 utilizing thiazole orange (TO) to label the RNA-containing reticulocytes. All three probands had a unique population of CD71<sup>+</sup>/TO<sup>-</sup> cells not typically observed in control samples (Figure 2A). Using imaging flow cytometry (IFC), we could see that this population included mature biconcave RBCs (Figure S4) which do not normally carry CD71 on their membrane. A relative decrease in the proportion of more mature CD71<sup>-</sup>/TO<sup>+</sup> reticulocytes was also noted (Figure 2B). Together, these data demonstrate defective CD71 trafficking associated with either of the *VPS4A*

---

proband 1 are colored green (Arg284 [R284] in p1), yellow (Gly203 [G203] in p2), and orange (Ala28 [A28] in p3). (v) The structure of human *VPS4A* MIT domain (PDB: 1YXR) with Ala28 (A28) and neighboring residues shown as spheres (left). Modeling of the Val28 variant (orange) found in p3 demonstrates clashes with the side chains of Leu70 and Glu19, as well as the main chain of Ala16 and Asp20 (side chain not shown for clarity) (right). All protein structure figures were generated with UCSF Chimera.<sup>13</sup>



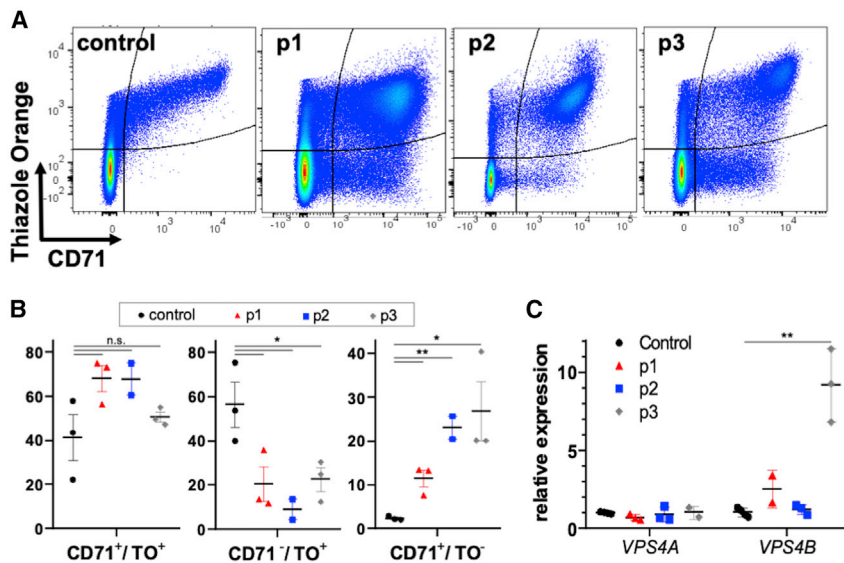

**Figure 2. Peripheral Blood Phenotype of Probands with VPS4A Mutations**

(A) Flow cytometry analysis of probands' peripheral RBCs (CD45<sup>-</sup>) showing presence of an unusual population positive for transferrin receptor (CD71<sup>+</sup>) and negative for RNA, as labeled by thiazole orange (TO).

(B) Quantification of immature RBC populations analyzed by flow cytometry and IFC (CD71<sup>+</sup>/TO<sup>+</sup>, CD71<sup>-</sup>/TO<sup>+</sup>, and CD71<sup>+</sup>/TO<sup>-</sup>) as a percentage of total CD71<sup>+</sup> and/or TO<sup>+</sup> cells (excluding all mature CD71<sup>-</sup>/TO<sup>-</sup> RBCs since probands 1 and 2 are regularly transfused). Samples from individuals with sickle cell disease (SCD) were used as positive controls with increased reticulocyte counts. Data shown are mean ± SEM of n = 3 experiments for all but p2 (n = 2). \* p < 0.05 and \*\*p < 0.01 by a Student's t test for samples with unequal variance.

(C) Relative expression of VPS4A and VPS4B in CD71<sup>+</sup> reticulocytes isolated from whole blood and evaluated by qPCR. Data are mean ± SEM, n = 4 control; n = 3 p1&2 VPS4A, p2&3 VPS4B; n = 2 p1 VPS4B, p3 VPS4A, \*\*p < 0.01 by a Student's t test for samples with unequal variance.

heterozygous variants p.Arg284Trp or p.Gly203Glu or the homozygous p.Ala28Val variant, consistent with the observation of abnormal endosomal compartments in VPS4A p.Arg284Trp mutant fibroblasts by Rodger et al.<sup>10</sup>

The levels of expression for VPS4A and VPS4B (MIM: 609983) vary between different mammalian tissues; in mice, most tissues show a strong bias for one of the two Vps4 proteins.<sup>25</sup> This tissue specificity may explain the predominance of neurological and erythroid lineage manifestations in the syndrome described. Since the two human VPS4 paralogs share 80% similarity in their sequence, they may be able to compensate for each other through redundancy of function or even interaction and assembly into mixed hexamers.<sup>22</sup> Therefore, we evaluated by quantitative PCR the expression of VPS4A and VPS4B in CD71<sup>+</sup> reticulocytes isolated from the probands' peripheral blood. While VPS4A expression was not significantly affected by any of the mutations, we observed significantly increased VPS4B expression in proband 3 (Figure 2C), indicating that VPS4B may partially, but not adequately, compensate for the VPS4A loss of function in the homozygous p.Ala28Val variant, possibly contributing to the milder disease phenotype.

In order to model the probands' bone marrow disease *in vitro*, we optimized a culture protocol to differentiate iPSCs, generated from peripheral blood mononuclear cells (PBMCs), to hematopoietic progenitors and then to erythroblasts, and compared the erythroblasts produced from proband 1-derived iPSCs, carrying heterozygous VPS4A p.Arg284Trp, with erythroblasts produced from healthy control donor iPSCs (Figure 3). iPSCs derived from an individual with CDA-I due to compound heterozygous CDAN1 mutations<sup>26</sup> were used in two of the experiments as a positive (diseased) control. The culture schema

and the hematopoietic and erythroid differentiation are shown in Figures 3A–3C, while statistics for each population demonstrating the repeatability of the process are detailed in Tables S1 and S2. iPSCs were differentiated for the first 10 days of the culture into hematopoietic progenitor cells identified as CD43<sup>+</sup>/CD41<sup>+</sup>/GPA<sup>+</sup> (Figure 3B), which were then harvested and placed into serum-free medium containing stem cell factor (SCF), erythropoietin (Epo), and dexamethasone for *ex vivo* erythropoiesis. After 5 days (day 10+5), the cells had lost CD41 and CD34 but retained GPA as they had differentiated into proerythroblasts based on flow cytometry analysis that monitors erythroid differentiation using GPA, Band 3, and  $\alpha_4$  integrin (Figures 3B and 3C).<sup>27</sup> On day 10+5, normal control cells were typically 40%–60% GPA<sup>+</sup> and out of those, 60%–75% were proerythroblasts ( $\alpha_4^{\text{high}}$ /Band 3<sup>-</sup>). At this point, SCF was removed and the Epo-containing medium was supplemented with human serum, supporting further erythroblast differentiation. After 3 days (day 10+8), the cells were >65% GPA<sup>+</sup> and primarily  $\alpha_4^{\text{high/mid}}$ /Band 3<sup>+</sup> consistent with late basophilic to polychromatophilic erythroblasts (Figure 3C), at which point cells were fixed for morphology evaluation by IFC. *Ex vivo* erythropoiesis from iPSCs with VPS4A p.Arg284Trp heterozygous variant was less synchronous in comparison to control and the erythroblasts matured more rapidly than controls (Figure 3D). Cytospins indicated increased frequency of binucleated erythroblasts (Figure 3E) while poor growth was evident in the proband-derived culture, similar to the CDAN1 mutant cells and in contrast to a brisk growth in the normal control culture (Figure 3F).

To evaluate the role of VPS4 proteins in erythroblast division, we first examined the localization of VPS4A/B in dividing erythroblasts cultured from normal human

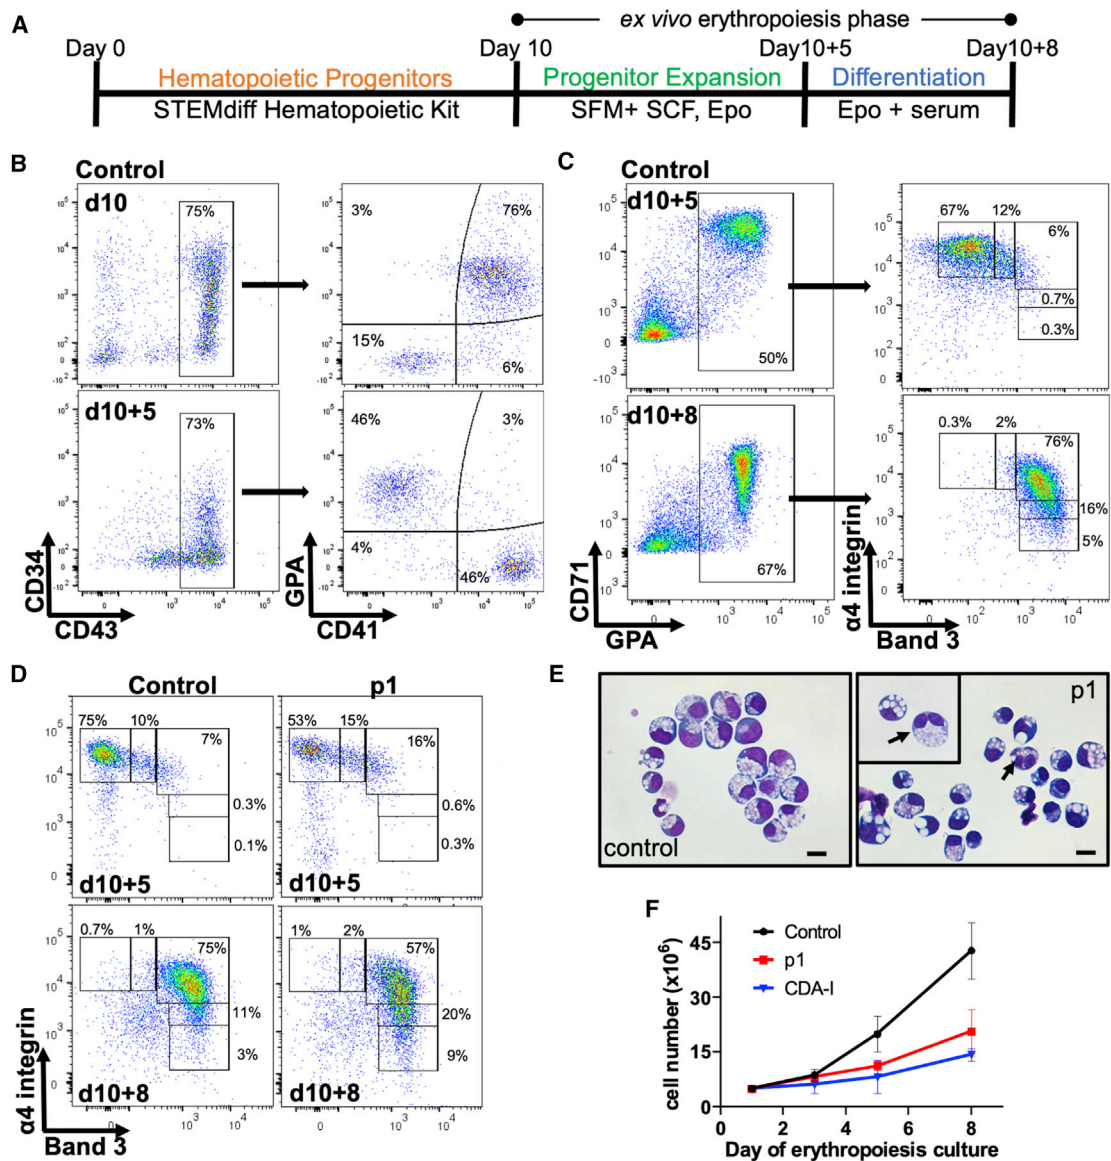

**Figure 3. Proband-Derived iPSCs Recapitulate the Clinical Phenotype of Dyserythropoiesis**

(A) Schematic of iPSC differentiation into hematopoietic progenitors followed by *ex vivo* erythropoiesis. (B) Flow cytometry analysis of the CD34<sup>+</sup>/CD43<sup>+</sup>/CD41<sup>+</sup>/GPA<sup>+</sup> hematopoietic progenitors harvested on day 10 from control iPSCs. (C) Flow cytometry analysis of control iPSC-derived erythroblasts by GPA,  $\alpha_4$  integrin, and Band 3. (D) Flow cytometry analysis of erythroblasts produced in *ex vivo* erythropoiesis cultures from control- and p1-derived iPSCs. (E) Wright-stained cytopins from day 10+8 cultures (arrows indicate binucleated erythroblasts). Scale bar 10  $\mu$ m. (F) Average growth curves for iPSC lines used in the *ex vivo* erythropoiesis phase of the culture (mean  $\pm$  SEM, n = 4 for control and p1; n = 2 for cultures initiated from CDA-I iPSCs).

CD34<sup>+</sup> cells using an antibody that recognizes both VPS4A and VPS4B. By IFC, we found that VPS4 localized to the spindle poles and midbody of dividing erythroblasts (Figure 4A), as has been previously described in HeLa cells.<sup>9</sup> VPS4 was also detected in the midbody during abscission in erythroblasts produced from both control and proband iPSC cultures (Figure 4B, panels 1–3); however, in control cells, VPS4 was present throughout the midbody, while in the proband line, VPS4 typically did not extend into the midbody with tubulin evident through gaps in VPS4 staining (Figures 4B and 4C). In addition, persistent cytoplasmic bridges between eryth-

roblasts were often observed in proband 1 cultures even after attempted completion of cytokinesis, as assessed by the lack of a tubulin-based midbody structure (Figure 4B, panel 4). These erythroid cells appear very similar to those present in the proband's bone marrow aspirate (Figure 1A insets) and were confirmed by confocal microscopy to be devoid of DNA (Figure 4D). Erythroblasts cultured from proband 1-derived iPSCs were verified by IFC to have a higher incidence of binucleation (Figures 4E and 4F).

In summary, we have identified *VPS4A* as a gene associated with congenital dyserythropoietic anemia in three unrelated probands with a syndrome characterized

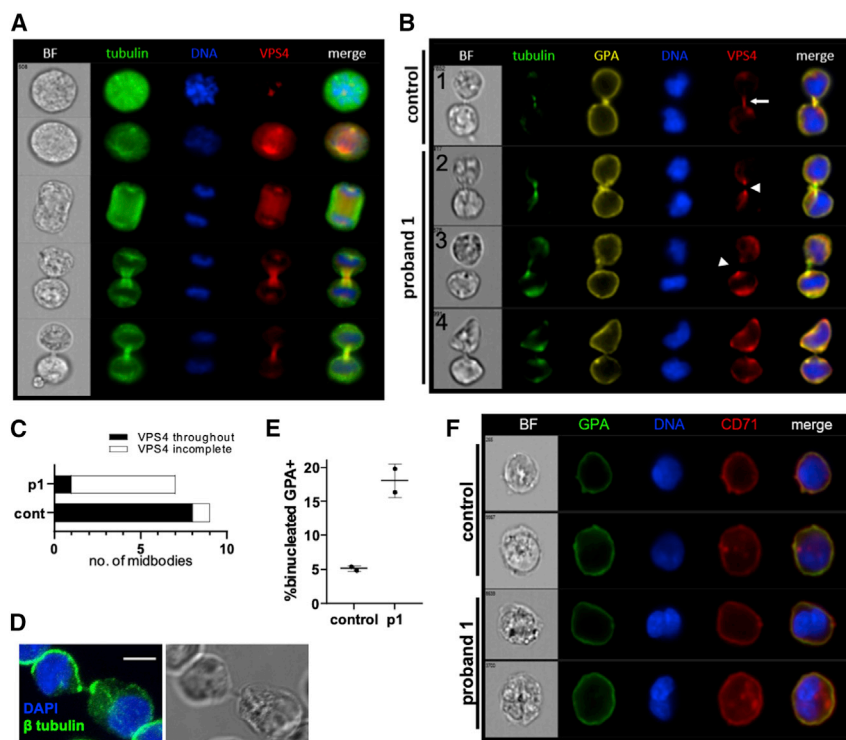

## Figure 4. VPS4A Is Critical for Normal Erythroblast Cytokinesis

(A) Imaging flow cytometry (IFC) analysis of VPS4 localization in dividing erythroblasts cultured from normal human CD34<sup>+</sup> cells showing  $\beta$ -tubulin (green), DNA/Hoechst (blue), and VPS4 (red).

(B) Representative images of erythroblasts produced from control and proband 1-derived iPSCs undergoing cytokinesis showing congruent staining of VPS4 (red) and tubulin (green) in the midbody of control cells (panel 1) but mislocalization of VPS4 relative to tubulin in p1-derived erythroblasts (panels 2 and 3). Post-mitotic erythroblasts with mutant VPS4A are frequently observed to remain connected with persistent cytoplasmic bridges, indicating abscission failure (panel 4).

(C) Analysis of VPS4 localization in midbodies demonstrated that VPS4 was present throughout the midbody in 8 out of 9 events observed in control cells, but only in 1 out of 7 events observed in the proband line.

(D) Confocal immunofluorescence imaging of an erythroblast generated *in vitro* from proband 1-derived iPSCs with a cytoplasmic bridge containing no DNA (blue). Scale bar 5  $\mu$ m.

(E) A higher frequency of binucleated erythroblasts was observed in proband 1-derived

iPSC cultures versus control (>300 cells analyzed by IFC out of two biologic repeats, mean  $\pm$  SEM).

(F) Representative IFC images of normal nuclei in control erythroblasts and binucleated erythroblasts from *ex vivo* erythropoiesis cultures from control and proband 1-derived iPSCs.

by CDA and severe neurodevelopmental delay. Using proband-derived iPSCs we have modeled the hematologic aspects of the disease *in vitro*, recapitulating the dyserythropoietic phenotype, and developed an *in vitro* system to facilitate further studies in CDA and other diseases of terminal erythropoiesis. Our findings demonstrate that normal function of VPS4A is essential for human erythropoiesis.

## Data and Code Availability

The variants identified in this work have been submitted to ClinVar (submission ID: SUB8385045). WES datasets have not been deposited in a public repository due to privacy and ethical restrictions.

## Supplemental Data

Supplemental Data can be found online at <https://doi.org/10.1016/j.ajhg.2020.10.013>.

## Acknowledgments

We thank the families for their generous participation in CDAR. We thank Drs. Jose Cancelas, Mohandas Narla, and Yi Zheng for their valuable advice. Molecular graphics and analyses performed with UCSF Chimera, developed by the Resource for Biocomputing, Visualization, and Informatics at the University of California, San

Francisco, with support from NIH P41-GM103311.<sup>13</sup> All flow cytometric data were acquired using equipment maintained by the Research Flow Cytometry Core in the Division of Rheumatology at Cincinnati Children's Hospital Medical Center. Healthy donor cells were provided by the Cell Processing Core in Division of Experimental Hematology and Cancer Biology. This work was supported by the National Institutes of Health, National Heart, Lung, and Blood Institute grant R01HL116352 (T.A.K.), National Institute of General Medical Sciences grant R01GM110628 (C.M.L.), the Cincinnati Children's Hospital CPG (Center for Pediatric Genomics), and CuSTOM (Center for Stem Cell & Organoid Medicine) funding awards.

## Declaration of Interests

The authors declare no competing interests.

Received: July 3, 2020

Accepted: October 26, 2020

Published: November 12, 2020

## Web Resources

CDAR clinical trial, <https://clinicaltrials.gov/ct2/show/NCT02964494>

European Molecular Biology Laboratory (EMBL-EBI), <https://www.ebi.ac.uk/Tools/msa/clustalo/>

Online Mendelian Inheritance in Man, <https://www.omim.org>

Protein Data Bank, <https://www.rcsb.org/>

UCSF Chimera Molecular Modeling, <https://www.cgl.ucsf.edu/chimera/>



## References

1. Heimpel, H., and Wendt, F. (1968). Congenital dyserythropoietic anemia with karyorrhexis and multinuclearity of erythroblasts. *Helv. Med. Acta* 34, 103–115.
2. Iolascon, A., Heimpel, H., Wahlin, A., and Tamary, H. (2013). Congenital dyserythropoietic anemias: molecular insights and diagnostic approach. *Blood* 122, 2162–2166.
3. Risinger, M., Emberesh, M., and Kalfa, T.A. (2019). Rare Hereditary Hemolytic Anemias: Diagnostic Approach and Considerations in Management. *Hematol. Oncol. Clin. North Am.* 33, 373–392.
4. McCullough, J., Frost, A., and Sundquist, W.I. (2018). Structures, Functions, and Dynamics of ESCRT-III/Vps4 Membrane Remodeling and Fission Complexes. *Annu. Rev. Cell Dev. Biol.* 34, 85–109.
5. Babst, M., Sato, T.K., Banta, L.M., and Emr, S.D. (1997). Endosomal transport function in yeast requires a novel AAA-type ATPase, Vps4p. *EMBO J.* 16, 1820–1831.
6. Baumgärtel, V., Ivanchenko, S., Dupont, A., Sergeev, M., Wiseman, P.W., Kräusslich, H.G., Bräuchle, C., Müller, B., and Lamb, D.C. (2011). Live-cell visualization of dynamics of HIV budding site interactions with an ESCRT component. *Nat. Cell Biol.* 13, 469–474.
7. Hessvik, N.P., and Llorente, A. (2018). Current knowledge on exosome biogenesis and release. *Cell. Mol. Life Sci.* 75, 193–208.
8. Mierzwa, B.E., Chiaruttini, N., Redondo-Morata, L., von Filseck, J.M., König, J., Larios, J., Poser, I., Müller-Reichert, T., Scheuring, S., Roux, A., and Gerlich, D.W. (2017). Dynamic subunit turnover in ESCRT-III assemblies is regulated by Vps4 to mediate membrane remodelling during cytokinesis. *Nat. Cell Biol.* 19, 787–798.
9. Morita, E., Colf, L.A., Karren, M.A., Sandrin, V., Rodesch, C.K., and Sundquist, W.I. (2010). Human ESCRT-III and VPS4 proteins are required for centrosome and spindle maintenance. *Proc. Natl. Acad. Sci. USA* 107, 12889–12894.
10. Rodger, C., Flex, E., Allison, R.J., Sanchis-Juan, A., Hasenahuer, M.A., Cecchetti, S., French, C.E., Edgar, J.R., Carpentieri, G., Ciolfi, A., et al. (2020). De novo VPS4A mutations cause multi-system disease with abnormal neurodevelopment. *Am. J. Hum. Genet.* 107, this issue, 1129–1148.
11. Tamary, H., Dgany, O., Proust, A., Krasnov, T., Avidan, N., Eidelitz-Markus, T., Tchernia, G., Geneviève, D., Cormier-Daire, V., Bader-Meunier, B., et al. (2005). Clinical and molecular variability in congenital dyserythropoietic anaemia type I. *Br. J. Haematol.* 130, 628–634.
12. Han, H., Monroe, N., Sundquist, W.I., Shen, P.S., and Hill, C.P. (2017). The AAA ATPase Vps4 binds ESCRT-III substrates through a repeating array of dipeptide-binding pockets. *eLife* 6, 6.
13. Pettersen, E.F., Goddard, T.D., Huang, C.C., Couch, G.S., Greenblatt, D.M., Meng, E.C., and Ferrin, T.E. (2004). UCSF Chimera—a visualization system for exploratory research and analysis. *J. Comput. Chem.* 25, 1605–1612.
14. Han, H., and Hill, C.P. (2019). Structure and mechanism of the ESCRT pathway AAA+ ATPase Vps4. *Biochem. Soc. Trans.* 47, 37–45.
15. Adell, M.A.Y., Vogel, G.F., Pakdel, M., Müller, M., Lindner, H., Hess, M.W., and Teis, D. (2014). Coordinated binding of Vps4 to ESCRT-III drives membrane neck constriction during MVB vesicle formation. *J. Cell Biol.* 205, 33–49.
16. Monroe, N., Han, H., Shen, P.S., Sundquist, W.I., and Hill, C.P. (2017). Structural basis of protein translocation by the Vps4-Vta1 AAA ATPase. *eLife* 6, 6.
17. Su, M., Guo, E.Z., Ding, X., Li, Y., Tarrasch, J.T., Brooks, C.L., 3rd, Xu, Z., and Skiniotis, G. (2017). Mechanism of Vps4 hexamer function revealed by cryo-EM. *Sci. Adv.* 3, e1700325.
18. Wendler, P., Ciniawsky, S., Kock, M., and Kube, S. (2012). Structure and function of the AAA+ nucleotide binding pocket. *Biochim. Biophys. Acta* 1823, 2–14.
19. Scott, A., Chung, H.Y., Gonciarz-Swiatek, M., Hill, G.C., Whitby, F.G., Gaspar, J., Holton, J.M., Viswanathan, R., Ghafarian, S., Hill, C.P., and Sundquist, W.I. (2005). Structural and mechanistic studies of VPS4 proteins. *EMBO J.* 24, 3658–3669.
20. Scott, A., Gaspar, J., Stuchell-Breterton, M.D., Alam, S.L., Skalicky, J.J., and Sundquist, W.I. (2005). Structure and ESCRT-III protein interactions of the MIT domain of human VPS4A. *Proc. Natl. Acad. Sci. USA* 102, 13813–13818.
21. Kieffer, C., Skalicky, J.J., Morita, E., De Domenico, I., Ward, D.M., Kaplan, J., and Sundquist, W.I. (2008). Two distinct modes of ESCRT-III recognition are required for VPS4 functions in lysosomal protein targeting and HIV-1 budding. *Dev. Cell* 15, 62–73.
22. Scheuring, S., Röhrich, R.A., Schöning-Burkhardt, B., Beyer, A., Müller, S., Abts, H.F., and Köhler, K. (2001). Mammalian cells express two VPS4 proteins both of which are involved in intracellular protein trafficking. *J. Mol. Biol.* 312, 469–480.
23. Blanc, L., and Vidal, M. (2010). Reticulocyte membrane remodeling: contribution of the exosome pathway. *Curr. Opin. Hematol.* 17, 177–183.
24. Géminard, C., De Gassart, A., Blanc, L., and Vidal, M. (2004). Degradation of AP2 during reticulocyte maturation enhances binding of hsc70 and Alix to a common site on TFR for sorting into exosomes. *Traffic* 5, 181–193.
25. Beyer, A., Scheuring, S., Müller, S., Mincheva, A., Lichter, P., and Köhler, K. (2003). Comparative sequence and expression analyses of four mammalian VPS4 genes. *Gene* 305, 47–59.
26. Dgany, O., Avidan, N., Delaunay, J., Krasnov, T., Shalmon, L., Shalev, H., Eidelitz-Markus, T., Kapelushnik, J., Cattani, D., Pariente, A., et al. (2002). Congenital dyserythropoietic anemia type I is caused by mutations in codanin-1. *Am. J. Hum. Genet.* 71, 1467–1474.
27. Hu, J., Liu, J., Xue, F., Halverson, G., Reid, M., Guo, A., Chen, L., Raza, A., Galili, N., Jaffray, J., et al. (2013). Isolation and functional characterization of human erythroblasts at distinct stages: implications for understanding of normal and disordered erythropoiesis in vivo. *Blood* 121, 3246–3253.

**Supplemental Data**

**VPS4A Mutations in Humans Cause Syndromic**

**Congenital Dyserythropoietic Anemia**

**due to Cytokinesis and Trafficking Defects**

**Katie G. Seu, Lisa R. Trump, Sana Emberesh, Robert B. Lorsbach, Clarissa Johnson, Jessica Meznarich, Hunter R. Underhill, Stella T. Chou, Haripriya Sakthivel, Nicolas N. Nassar, Kalani J. Seu, Lionel Blanc, Wenying Zhang, Carolyn M. Lutzko, and Theodosia A. Kalfa**

**Proband 1 (age 1.5 years)**

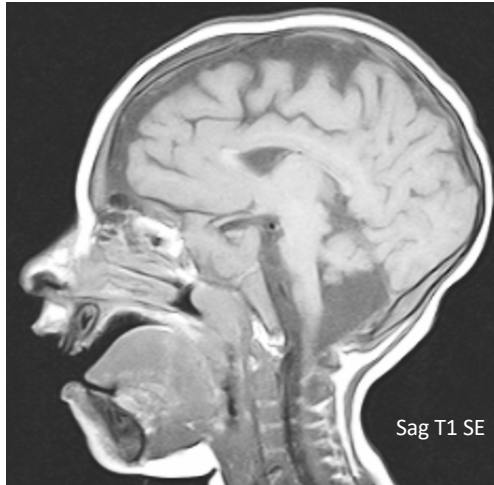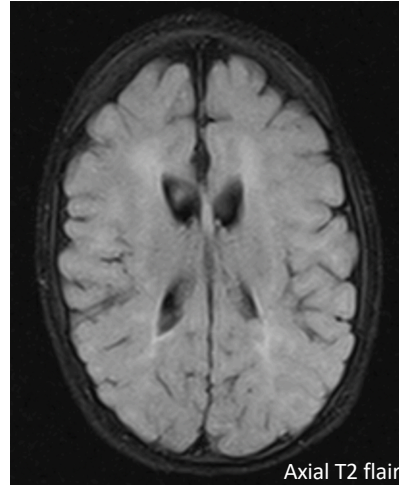

**Proband 2 (age 5.5 years)**

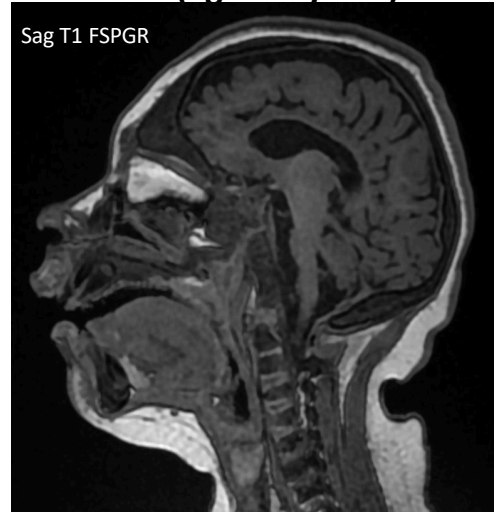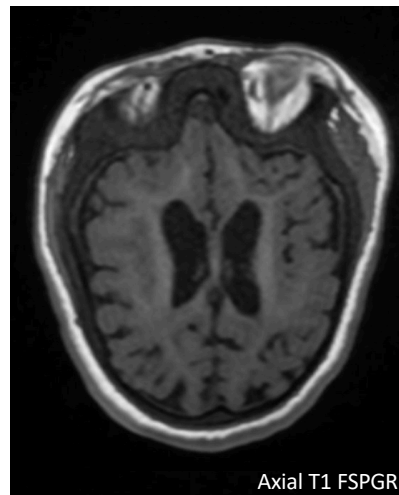

**Proband 3 (age 3.5 years)**

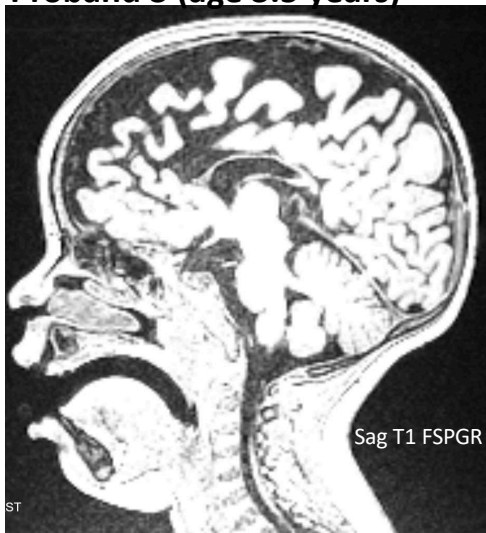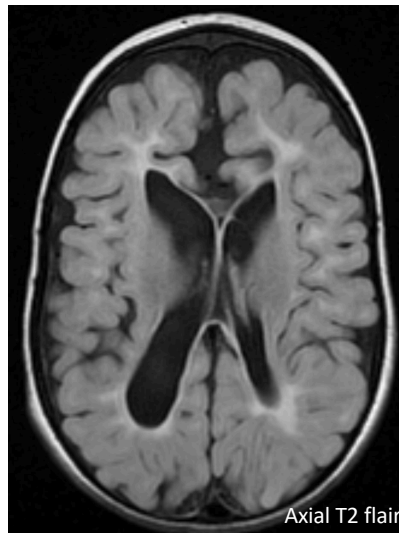

**Figure S1. Sagittal and axial views of brain MRI.** Probands 1 and 2 have microcephaly, as evidenced by craniofacial disproportion as well as atrophy of the cerebellum and the pons. The cerebellum and pons are less affected in proband 3, but she shares the diffuse gray/white matter loss and delayed myelination of the supratentorial brain with probands 1 and 2, the thinning of the corpus callosum, and *ex vacuo* enlargement of the extra-axial spaces. Enlarged lateral ventricles are noted in probands 2 and 3 due to the loss of periventricular white matter.



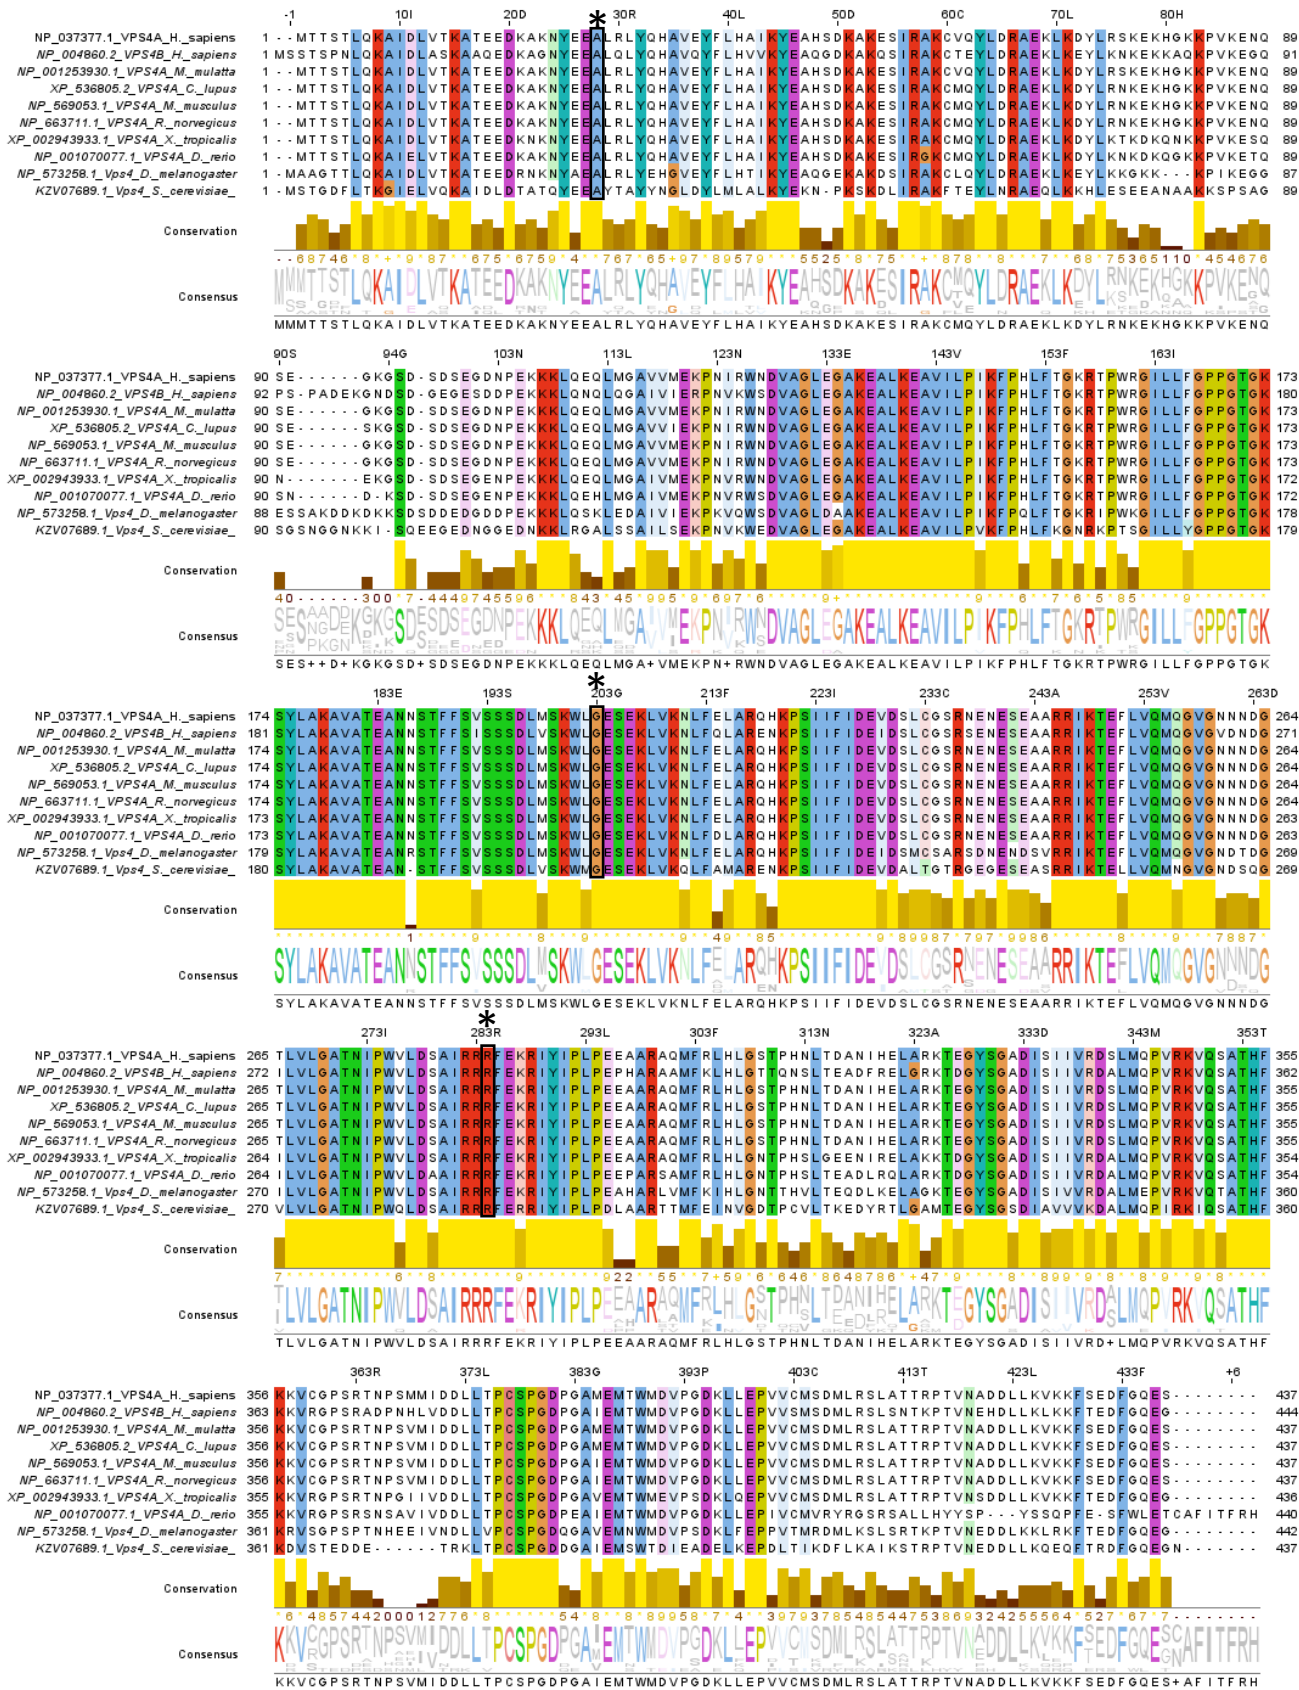

**Figure S2. Multiple sequence alignment of human VPS4A and VPS4 from other species.** Multiple sequence alignment for VPS4A and B shows the high degree of conservation of VPS4A across species down to yeast. Residues are numbered based on the human VPS4A as the reference sequence and colored columns indicate a residue is >75% conserved; full conservation histogram and the consensus sequence appear below. The amino acids A28, G203, and R284 mutated in the probands presented are signified by an asterisk and are conserved down to yeast. Alignment was performed with Clustal Omega accessed from European Molecular Biology Laboratory-European Bioinformatics Institute ([EMBL-EBI](https://www.ebi.ac.uk/Tools/msa/clustalo/)) (<https://www.ebi.ac.uk/Tools/msa/clustalo/>) and analyzed using JalView.

# Figure S3

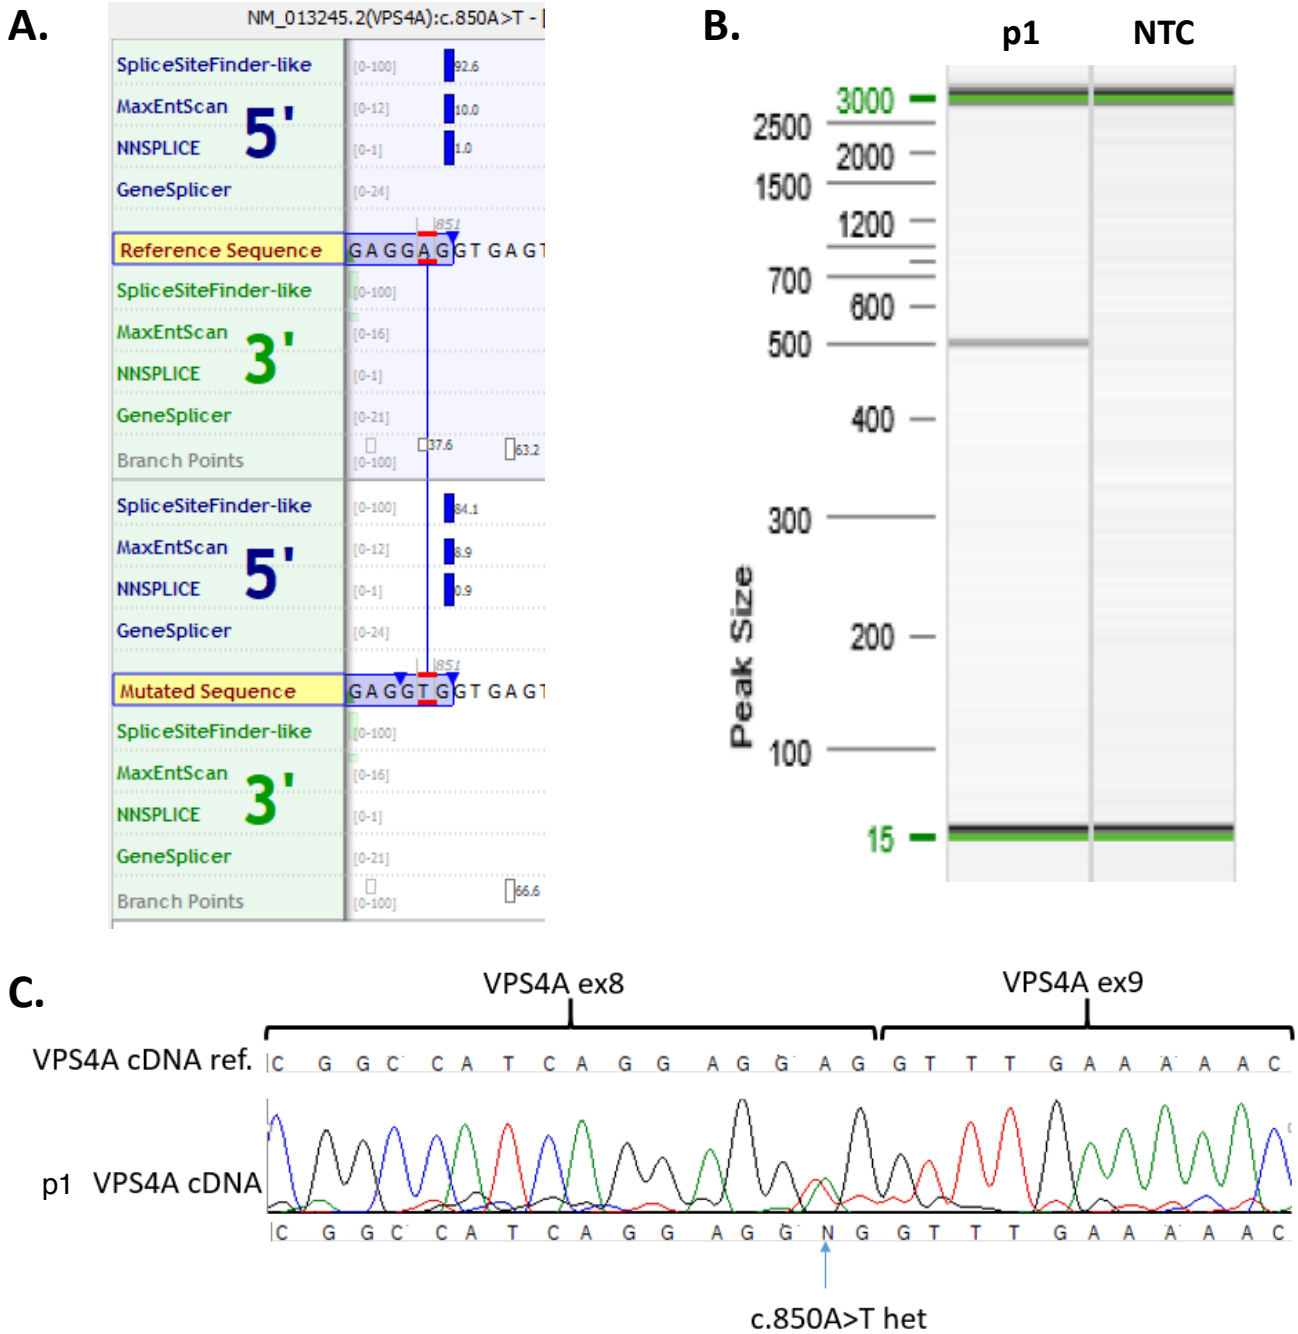

**Figure S3. cDNA sequencing analysis of *VPS4A* c.850A>T variant.** (A) *VPS4A* c.850A>T (p.Arg284Trp) is a mutation of the penultimate base of exon 8. Multiple splice prediction programs suggested it may affect the splice donor site of intron 8, indicated by score reductions over 10%.<sup>1</sup> (B) Gel image of *VPS4A* fragment containing c.850A>T after amplification with reverse transcription polymerase chain reaction (RT-PCR) showing the cDNA product at ~500 bp as expected for the wild type allele. (C) Sequence chromatogram showing that this variant is a missense mutation rather than having alternative splicing effect.

# Figure S4

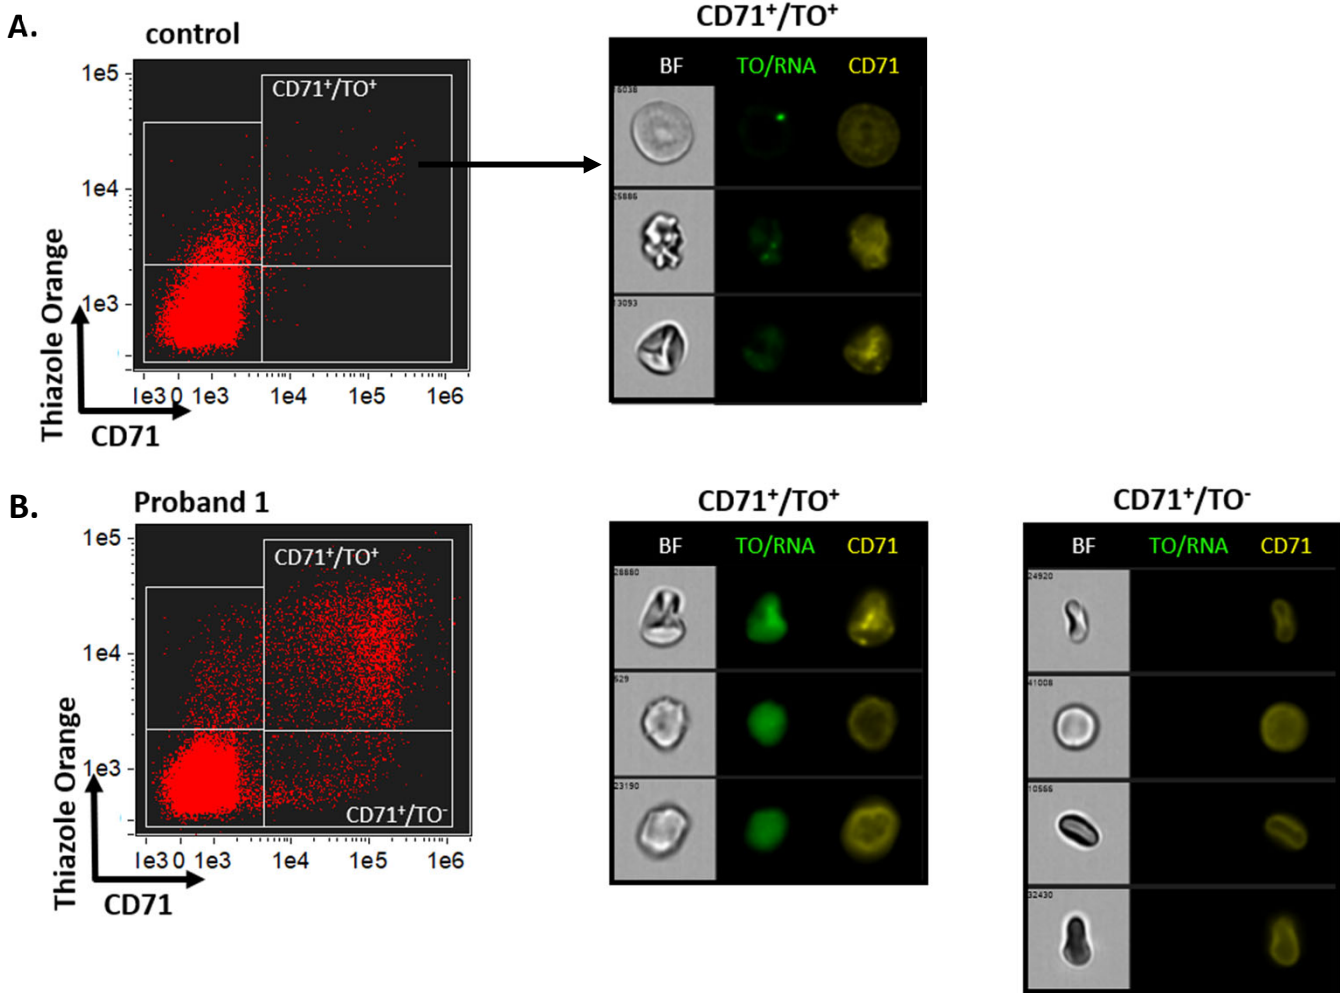

**Figure S4. Imaging flow cytometry analysis of peripheral blood reticulocytes. (A)** Flow cytogram and representative images from the CD71<sup>+</sup>/TO<sup>+</sup> reticulocyte population of an SCD control sample. **(B)** Flow cytogram and representative images from the CD71<sup>+</sup>/TO<sup>+</sup> reticulocyte (middle) and unique CD71<sup>+</sup>/TO<sup>-</sup> populations (right) in whole blood from proband 1. The CD71<sup>+</sup>/TO<sup>-</sup> population contains mature RBCs (not reticulocytes) still retaining CD71 in their membrane. Similar results were obtained for all three probands.



**Table S1.** Flow cytometry analysis of hematopoietic progenitors.

|                 |            | control iPSCs, n=6 |      | proband 1 iPSCs, n=5 |      | p value |
|-----------------|------------|--------------------|------|----------------------|------|---------|
|                 |            | mean               | SD   | mean                 | SD   |         |
| <b>day 10</b>   | CD43+      | 65.1               | 13.5 | 63.7                 | 6.3  | n.s.    |
|                 | GPA+/CD41- | 4.5                | 2.8  | 1.5                  | 0.7  | n.s.    |
|                 | GPA+/CD41+ | 66.3               | 12.2 | 66.7                 | 13.3 | n.s.    |
|                 | GPA-/CD41+ | 17.9               | 13.4 | 23.0                 | 10.7 | n.s.    |
|                 | GPA-/CD41- | 11.8               | 2.2  | 9.2                  | 3.3  | n.s.    |
| <b>day 10+5</b> | CD43+      | 76.2               | 3.5  | 69.1                 | 4.0  | p<0.05  |
|                 | GPA+/CD41- | 44.7               | 10.3 | 38.9                 | 15.9 | n.s.    |
|                 | GPA+/CD41+ | 4.9                | 1.9  | 7.8                  | 1.6  | p<0.05  |
|                 | GPA-/CD41+ | 47.5               | 11.4 | 52.1                 | 15.7 | n.s.    |
|                 | GPA-/CD41- | 3.0                | 1.1  | 1.4                  | 0.4  | p<0.05  |

Hematopoietic progenitors produced from iPSCs were identified at day 10 of hematopoietic differentiation culture (**Figure 3**) as CD43<sup>+</sup>/CD235a(GPA)<sup>+</sup>/CD41<sup>+</sup>.<sup>2-4</sup> At day 10, control cells were typically 60-70% CD43<sup>+</sup> and 60-70% of those were GPA<sup>+</sup>/CD41<sup>+</sup>. After 5 days of *ex vivo* erythropoiesis (day 10+5), control cells were typically still 70% CD43<sup>+</sup> with very few being GPA<sup>+</sup>/CD41<sup>+</sup> (<5%); ~50% of the CD43<sup>+</sup> cells had lost CD41 and were now only GPA<sup>+</sup>, while the remainder of the cells were CD41<sup>+</sup>/GPA<sup>-</sup>. Data presented are mean ± SD of n=6 cultures from control iPSCs and n=5 cultures from proband 1-derived iPSCs; p values determined by Student's t-test.

**Table S2.** Flow cytometry analysis of ex vivo erythropoiesis cultures.

|                 |      | control iPSCs, n=7 |     | proband 1 iPSCs, n=6 |      | p value |
|-----------------|------|--------------------|-----|----------------------|------|---------|
|                 |      | mean               | SD  | mean                 | SD   |         |
| <b>day 10+5</b> | GPA+ | 51.1               | 7.7 | 52.7                 | 8.3  | n.s.    |
|                 | E1   | 65.2               | 8.8 | 47.5                 | 6.4  | p<0.05  |
|                 | E2   | 15.1               | 6.9 | 19.5                 | 4.6  | n.s.    |
|                 | E3   | 8.3                | 2.0 | 16.2                 | 2.3  | p<0.001 |
|                 | E4   | 0.9                | 0.5 | 0.8                  | 0.3  | n.s.    |
|                 | E5   | 0.3                | 0.2 | 0.5                  | 0.3  | n.s.    |
| <b>day 10+8</b> | GPA+ | 76.4               | 6.4 | 69.0                 | 15.9 | n.s.    |
|                 | E1   | 0.3                | 0.3 | 0.7                  | 0.5  | n.s.    |
|                 | E2   | 1.3                | 0.7 | 3.0                  | 4.8  | n.s.    |
|                 | E3   | 74.8               | 2.4 | 60.6                 | 6.8  | p<0.001 |
|                 | E4   | 14.9               | 2.4 | 19.1                 | 1.3  | p<0.05  |
|                 | E5   | 4.8                | 1.7 | 9.7                  | 2.9  | p<0.05  |

Gating of  $\alpha_4$  integrin vs band 3 to monitor erythroblast differentiation was done as described previously.<sup>5</sup> Gates are numbered here as E1-E5 going clockwise from the top left corner (most immature erythroblasts), to bottom right (most mature erythroblasts), as shown in **Figure 3C&D**. At day 10+5, 50% of the control cells were typically GPA<sup>+</sup>; 70% of those fell into the E1 gate corresponding to proerythroblasts (top left gate,  $\alpha_4$  integrin<sup>high</sup>/Band 3<sup>-</sup>). By day 10+8, approximately 75% of the cells were GPA<sup>+</sup>; approximately 70% of those appeared in the E3 gate corresponding to late basophilic erythroblasts ( $\alpha_4$  integrin<sup>int</sup>/Band 3<sup>+</sup>) and some (~15%) polychromatophilic erythroblasts (E4,  $\alpha_4$  integrin<sup>low</sup>/Band 3<sup>+</sup>). In the proband line, the percent of GPA<sup>+</sup> cells was similar to the control; however, erythroblast differentiation progressed faster in the proband-derived line versus the control. At day 10+5, only 48% on average of the *VPS4A*-mutant GPA<sup>+</sup> cells fell into the E1 gate versus 65% for the control GPA<sup>+</sup> cells (p<0.05), with the rest progressing to more mature stages of differentiation, particularly in E3. Similarly, at day 10+8, just 60% fell into the E3 gate (p<0.001), the rest of the cells being more advanced already than the control cells with significant increases in the subsequent E4 and E5 populations (p<0.05). Data presented are mean  $\pm$  SD of n=7 cultures of control iPSCs and n=6 cultures of proband 1 iPSCs; p values determined by Student's t-test.

**Table S3.** Antibodies used for flow cytometry and immunofluorescence

| Target/Type         | Conjugate    | Manufacturer              | Catalog No. | Used for:                              |
|---------------------|--------------|---------------------------|-------------|----------------------------------------|
| CD71                | BV421        | BD Biosciences            | 562995      | reticulocyte flow, erythroid flow, IFC |
| CD45                | PerCP-Cy5.5  | Biolegend                 | 304028      | reticulocyte flow, progenitor flow     |
| CD34                | BV421        | BD Biosciences            | 562577      | progenitor flow                        |
| CD43                | FITC         | BD Biosciences            | 555475      | progenitor flow                        |
| CD41                | APC          | BD Biosciences            | 559777      | progenitor flow                        |
| CD235a/GPA          | PE           | BD Biosciences            | 555570      | progenitor flow, erythroid flow, IFC   |
| $\alpha$ 4 integrin | APC          | BD Biosciences            | 559881      | erythroid flow                         |
| Band 3*             | Dylight488   | N/A                       | N/A         | erythroid flow                         |
| a-tubulin           | biotin       | eBioscience/Thermo Fisher | 13-4502-80  | IFC                                    |
| VPS4                | unconjugated | Sigma-Aldrich             | SAB4200025  | IFC                                    |
| B-tubulin           | unconjugated | Invitrogen/Thermo Fisher  | PA5-16863   | confocal                               |
| anti-rabbit         | AF488        | Invitrogen/Thermo Fisher  | A11034      | IFC                                    |
| anti-rabbit         | AF633        | Invitrogen/Thermo Fisher  | A21071      | confocal                               |
| Streptavidin        | AF647        | Invitrogen/Thermo Fisher  | S32357      | IFC                                    |
| Rb isotype IgG      | unconjugated | Cell Signaling Technology | 3900S       | IFC, confocal                          |

\*Dylight 488-conjugated Band 3 antibody was a generous gift from Dr. Mohandas Narla (New York Blood Center).



## **Materials and Methods**

### **Study Approval**

Individuals having clinical diagnosis of CDA and their parents were enrolled in CDAR ([ClinicalTrials.gov Identifier: NCT02964494](https://clinicaltrials.gov/ct2/show/study/NCT02964494)), a registry for individuals with the diagnosis of CDA in North America, under a protocol approved by the Institutional Review Board of Cincinnati Children's Hospital. The families provided written informed consent, in accordance with the Declaration of Helsinki. Normal human CD34<sup>+</sup> cells isolated from umbilical cord blood and normal control iPSCs were obtained from the Translational Research Development Support Laboratory of Cincinnati Children's Hospital under a protocol approved by this institute.

### **Hereditary Hemolytic Anemia Gene Panel**

DNA was isolated from peripheral blood and analyzed on a Next Generation Sequencing panel of genes known to be associated with hereditary hemolytic anemias (HHA panel); the regions of interest for enrichment and DNA sequencing included the coding exons plus 20 bases of intronic boundaries for 32 genes known to be associated with RBC membrane and enzyme disorders and with congenital dyserythropoietic anemias: ABCG5, ABCG8, AK1, ALDOA, ANK1, C15orf41, CDAN1, EPB41, EPB42, G6PD, GATA1, GCLC, GPI, GPX1, GSR, GSS, HK1, KIF23, KLF1, NT5C3A, PFKM, PGK1, PIEZO1, PKLR, RHAG, SEC23B, SLC2A1(GLUT1), SLC4A1, SPTA1, SPTB, TPI1, and XK. Regulatory regions and deep intronic areas of these genes with published disease-causing mutations were included in the HHA panel design.

### **Whole Exome Sequencing**

Samples from probands 1 and 2, as well as their parents, were submitted to GeneDx for clinical family trio-based whole exome sequencing (WES). Samples from proband 3 and the parents were submitted to Cincinnati Children's Hospital Medical Center for Integrated Genomic Analysis, which included

clinical trio-based WES and clinical chromosome microarray. As reported by the laboratories, the WES capture was performed using SureSelect Clinical Research Exome kit or SureSelect All Exon kit (Agilent). Enriched library fragments were sequenced on Illumina HiSeq system (Illumina). The reads were mapped against UCSC hg19 human reference and analyzed using custom-developed tool or Ingenuity Variant Analysis software (Qiagen).

### **cDNA amplification and sequencing**

RNA was extracted from reticulocytes of proband 1 using QIAamp RNA Blood Mini kit (Qiagen) per manufacturer protocol. High Capacity cDNA Reverse Transcription kit (Applied Biosystems) was used to generate cDNA from RNA. The following primers were used for reverse transcription polymerase chain reaction (RT PCR) to test the potential splicing effect of c.840A>T: *VPS4A* E7-10F CACAAGCCCTCCATCATCTT and *VPS4A* E7-10R GCATGGAGTCAGGAGGTCAT. The PCR program was: 1. 95° for 3 min; 2. 95° for 30sec; 3. 60° for 30sec; 4. 72° for 1 min; 5. Go to step 2 for 34 more times; 6. 72° for 5 min; 7. 12° forever. The PCR product was run on Qiaxcel Advanced system (Qiagen). The cDNA product size from wild type allele was expected to be 477 bp. According the manufactures guideline, the size variability range for fragments less than 500 bp is +/- 20bps. Sanger sequencing was performed at the Sequencing Core of Cincinnati Children's Hospital Medical Center.

### **Protein diagram and crystal structures**

The schematic of VPS4A domain structure was generated using the Illustrator for Biological Sequences (IBS, <http://ibs.biocuckoo.org/>).<sup>6</sup> Crystal structures for the yeast VPS4 hexamer (PDB ID: 6API) and human MIT domain (PDB ID: 1YXR) were accessed from the Protein Data Bank, [www.pdb.org](http://www.pdb.org) and visualized using UCSF Chimera.<sup>7</sup> All residue numbers labeled in the yeast VPS4 structure (6API) were identified and labeled with the corresponding residue numbers in human VPS4A based on multiple sequence alignment with Clustal (<http://www.clustal.org/omega/>) and as indicated by Poly-Phen II sequence alignment and predictions (<http://genetics.bwh.harvard.edu/pph2/>).

### **Reticulocyte isolation and qPCR**

Proband and control reticulocytes were isolated from peripheral blood using magnetic separation. Blood cells were washed, and the buffy coat was removed. RBCs were labeled with anti-human CD71 microbeads (Miltenyi Biotec), washed, and separated using positive selection on an autoMACS® Pro Separator (Miltenyi Biotec). RNA was isolated from CD71<sup>+</sup> reticulocyte pellets with the QIAamp RNA Blood Mini Kit (Qiagen). cDNA was generated using the High Capacity cDNA Reverse Transcription kit (Applied Biosystems) and qPCR was performed using TaqMan probes (*VPS4A*, Hs00203085\_m1; *VPS4B*, Hs01078182\_m1; and *ACTB*, Hs01060665\_g1) and TaqMan Universal PCR Master Mix. Relative expression was determined using the ddCt method. Control samples used were from individuals with reticulocytosis including sickle cell disease, iron-deficiency anemia post iv iron treatment, and autoimmune hemolytic anemia.

### **CD34<sup>+</sup> cell cultures**

Human CD34<sup>+</sup> cells were isolated from umbilical cord blood; the study protocol was reviewed by Cincinnati Children's Hospital Medical Center Institutional Review Board and was determined that this process does not meet the regulatory criteria for research involving human subjects. *Ex vivo* erythropoiesis culture from CD34<sup>+</sup> cells was performed according to the protocol of Giarratana, et al.<sup>8</sup> Briefly, cells are cultured in serum-free medium of StemPro-34 (Gibco), BIT 9500 (StemCell Technologies), ferrous sulfate (900 ng/ml), ferric nitrate (90 ng/ml), L-glutamine (Invitrogen), and pen/strep (Invitrogen). For days 0-5, the medium is supplemented with 10<sup>-6</sup> M hydrocortisone (Sigma), 100ng/ml SCF (Peprotech), 5ng/ml IL-3 (Peprotech), and 3 IU/ml erythropoietin (Epo, Amgen). For days 6-7, the medium is supplemented only with Epo, followed by 2-3 days with medium free of cytokines. Cultures are monitored by cytopins and flow cytometry to determine erythroblast stage.

## **Generation of iPSC-lines from healthy donors and individuals enrolled in CDAR**

Peripheral blood from healthy donors and individuals enrolled in CDAR was obtained at Cincinnati Children's Hospital Medical Center after signed informed consent, under Institutional Review Board (IRB)-approved research protocols. iPSCs were generated from peripheral blood mononuclear cells (PBMCs) as previously described.<sup>9; 10</sup> PBMCs were purified from peripheral blood by Ficoll separation (GE Healthcare) and plated at  $1-5 \times 10^6$  cells/mL in X-Vivo 10 (Lonza) supplemented with 10% FCS, SCF (100 ng/mL), TPO (100ng/mL), IL-3 (100ng/mL), IL-6 (20 ng/mL), FLT3L (100ng/mL) and GM-CSF (10ng/mL) (all cytokines from Peprotech) in a low-attachment plate (Corning) and cultured at 37°C in 5% CO<sub>2</sub>. After two days of culture, cells were transduced with a lentivirus containing OCT4, KLF4, MYC, and SOX2 using polybrene at MOI of 20-40.<sup>11</sup> Two days after lentiviral transduction, cells were plated onto irradiated mouse embryonic fibroblasts (MEF, GlobalStem) in X-Vivo 10 supplemented with 10% FCS, SCF (100 ng/mL), TPO (100 ng/mL), IL-3 (10 ng/mL), IL-6 (20 ng/mL), and FLT3L (100 ng/mL). After two days of culture on MEF, the media was changed to hESC media (DMEM F/12, 20% KnockOut Serum Replacement (KSR, Life Technologies), 1% L-glutamine, 1% NEAA, 0.1 mM β-mercaptoethanol) supplemented with 10 ng/mL bFGF (Peprotech). Once colonies with morphological characteristics of iPSCs were observed, they were plucked and passaged onto Matrigel (BD Biosciences) and cultured in mTeSR1 medium (Stem Cell Technologies). Targeted Sanger sequencing was performed on cell lines generated from probands to ensure they retained their respective mutations.

## ***Ex vivo* erythropoiesis culture from iPSCs**

Hematopoietic progenitors were derived from iPSCs using the STEMdiff hematopoietic kit (Stem Cell Technologies, Vancouver, BC). By day 10, the floating cells were enriched in multipotent hematopoietic progenitors (**Table S1**), identified as CD34<sup>+</sup>/CD43<sup>+</sup>/CD235a(GPA)<sup>+</sup>/CD41<sup>+</sup> by flow cytometry as previously described.<sup>2-4</sup> These were harvested and further differentiated in *ex vivo* erythropoiesis culture. The base medium (generously shared by Dr. Stella Chou in personal



communication) consisted of IMDM (Corning), Ham's F-12 (Corning), 0.05% BSA (Gibco), glutamine (Invitrogen), pen/strep (Invitrogen), N2 supplement (Gibco), B27 without retinoic acid (Gibco), 1-thioglycerol ( $4 \times 10^{-4}$  M, Sigma), and ascorbic acid (50ng/ml). For the first 5 days, the base medium was supplemented with Stem Cell Factor (SCF 50ng/ml, Peprotech), erythropoietin (Epo, 2U/ml, Amgen), and dexamethasone (0.4 $\mu$ g/ml). On day 10+5, cells were washed and returned to culture with medium supplemented with Epo, dexamethasone, and 5% human A/B serum (Sigma). Cells were harvested for experimental analysis on day 10+8 when control cells were primarily late basophilic and polychromatophilic erythroblasts (**Table S2**). Terminal differentiation of GPA<sup>+</sup> erythroid precursors in these cultures was monitored by flow cytometry of  $\alpha_4$  integrin and band 3<sup>5</sup> and by morphology on cytopins. For cytopins,  $\geq 50,000$  cells were suspended in 150 $\mu$ l of FBS and spun at 400 rpm for 3 minutes onto glass coverslips in a Cytospin-4 Cyto centrifuge (Thermo Shandon). After drying, coverslips were stained with Wright stain (Harleco EMD) following the manufacturer's protocol.

### **Flow Cytometry**

All antibodies used for flow cytometry are listed in **Table S3**. For analysis of reticulocytes by flow cytometry and imaging flow cytometry (IFC), 1 $\mu$ l whole blood was washed and resuspended in FACS buffer (PBS+0.5% BSA) containing fluorescently conjugated antibodies against CD45 and CD71. After 30min, cells were washed and resuspended in BD Retic-Count (BD) and incubated for 30min at room temperature following the manufacturer's protocol. For iPSC cultures, cells were resuspended in FACS buffer containing fluorescently conjugated antibodies and Fixable Viability Dye efluor780 (eBiosciences) and incubated for 30min at room temperature. Cells were then washed and analyzed on a FACSCanto II cytometer (BD Biosciences).

### **Imaging Flow Cytometry (IFC)**

For intracellular staining, cells from CD34<sup>+</sup> and iPSC cultures were fixed by adding 16% paraformaldehyde directly to cell culture dishes to a final concentration of 4%. After 30min, cells were

washed with PBS and stored at 4°C until staining. For immunofluorescence staining, fixed cell pellets were permeabilized with acetone as described previously.<sup>12</sup> Briefly, cells were washed in sequence with ice-cold 50% acetone, 100% acetone, and then 50% acetone. Permeabilized cells were then incubated with primary antibodies or isotype control (see **Table S3**) for 1 hr at room temperature, followed by incubation with secondary antibodies for 30 min at RT. For analysis of binucleated events, cells were stained with Fixable Viability Dye efluor780 (eBiosciences) prior to fixation with 4% PFA. Following fixation, cells were stained with conjugated antibodies (see Table S3) and Hoechst 34580 (Sigma) and incubated for 1hr at 37°C. Labeled cells were analyzed on an Imagestream ISX-100 (Amnis) and analysis was performed in IDEAS analysis software (Amnis).

### **Immunofluorescence staining and confocal microscopy**

Cultured cells were placed and cultured in ibidi imaging coverslip chambers at least 16hrs prior to fixation with 4% PFA for 30min. Cells were washed and then permeabilized and blocked with PBS+0.1% Tween-20 + 3% BSA. Samples were incubated with primary antibodies for 1hr at room temperature, washed, and incubated with secondary antibodies and DAPI for 30min at room temperature. See **Table S3** for all antibodies used. Stained cells were imaged on a Nikon C2 confocal microscope using 60x magnification.

## Supplemental References

1. Tang, R., Prosser, D.O., and Love, D.R. (2016). Evaluation of Bioinformatic Programmes for the Analysis of Variants within Splice Site Consensus Regions. *Adv Bioinformatics* 2016, 5614058.
2. Chou, S.T., Byrska-Bishop, M., Tober, J.M., Yao, Y., Vandorn, D., Opalinska, J.B., Mills, J.A., Choi, J.K., Speck, N.A., Gadue, P., et al. (2012). Trisomy 21-associated defects in human primitive hematopoiesis revealed through induced pluripotent stem cells. *Proc Natl Acad Sci U S A* 109, 17573-17578.
3. Vodyanik, M.A., Thomson, J.A., and Slukvin, II. (2006). Leukosialin (CD43) defines hematopoietic progenitors in human embryonic stem cell differentiation cultures. *Blood* 108, 2095-2105.
4. Klimchenko, O., Mori, M., Distefano, A., Langlois, T., Larbret, F., Lecluse, Y., Feraud, O., Vainchenker, W., Norol, F., and Debili, N. (2009). A common bipotent progenitor generates the erythroid and megakaryocyte lineages in embryonic stem cell-derived primitive hematopoiesis. *Blood* 114, 1506-1517.
5. Hu, J., Liu, J., Xue, F., Halverson, G., Reid, M., Guo, A., Chen, L., Raza, A., Galili, N., Jaffray, J., et al. (2013). Isolation and functional characterization of human erythroblasts at distinct stages: implications for understanding of normal and disordered erythropoiesis in vivo. *Blood* 121, 3246-3253.
6. Liu, W., Xie, Y., Ma, J., Luo, X., Nie, P., Zuo, Z., Lahrman, U., Zhao, Q., Zheng, Y., Zhao, Y., et al. (2015). IBS: an illustrator for the presentation and visualization of biological sequences. *Bioinformatics* 31, 3359-3361.
7. Pettersen, E.F., Goddard, T.D., Huang, C.C., Couch, G.S., Greenblatt, D.M., Meng, E.C., and Ferrin, T.E. (2004). UCSF Chimera--a visualization system for exploratory research and analysis. *J Comput Chem* 25, 1605-1612.
8. Giarratana, M.C., Kobari, L., Lapillonne, H., Chalmers, D., Kiger, L., Cynober, T., Marden, M.C., Wajcman, H., and Douay, L. (2005). Ex vivo generation of fully mature human red blood cells from hematopoietic stem cells. *Nat Biotechnol* 23, 69-74.
9. Nayak, R.C., Trump, L.R., Aronow, B.J., Myers, K., Mehta, P., Kalfa, T., Wellendorf, A.M., Valencia, C.A., Paddison, P.J., Horwitz, M.S., et al. (2015). Pathogenesis of ELANE-mutant severe neutropenia revealed by induced pluripotent stem cells. *J Clin Invest* 125, 3103-3116.
10. Kunisato, A., Wakatsuki, M., Shinba, H., Ota, T., Ishida, I., and Nagao, K. (2011). Direct generation of induced pluripotent stem cells from human nonmobilized blood. *Stem cells and development* 20, 159-168.
11. Warlich, E., Kuehle, J., Cantz, T., Brugman, M.H., Maetzig, T., Galla, M., Filipczyk, A.A., Halle, S., Klump, H., Scholer, H.R., et al. (2011). Lentiviral vector design and imaging approaches to visualize the early stages of cellular reprogramming. *Molecular therapy : the journal of the American Society of Gene Therapy* 19, 782-789.
12. Konstantinidis, D.G., Pushkaran, S., Giger, K., Manganaris, S., Zheng, Y., and Kalfa, T.A. (2014). Identification of a Murine Erythroblast Subpopulation Enriched in Eucleating Events by Multi-spectral Imaging Flow Cytometry. *JoVE*, e50990.
